# Supplementary material for: Synthesis, crystal structures and properties of transition metal coordination polymers based on a rigid triazole dicarboxylic acid
Source: Royal Society of Chemistry journal article supplement (doi:10.1039/c3ra43425g), 2013-01-01
Supplement: c3ra43425g.pdf [file c3ra43425g.pdf]

## Synthesis, Crystal Structures and Properties of Transition Metal Coordination Polymers Based on a Rigid Triazole Dicarboxylic Acid

Meihui Yu, Ming Hu\*, Zhenting Wu

(Inner Mongolia Key Laboratory of Chemistry and Physics of Rare Earth Materials,  
School of Chemistry and Chemical Engineering, Inner Mongolia University, Hohhot  
010021, China)

**Table S1.** Selected bond lengths [Å] and angles [°] for **1**

|                      |            |                   |            |
|----------------------|------------|-------------------|------------|
| Mn(1)-O(15)#1        | 2.115(2)   | Mn(3)-O(14)       | 2.088(3)   |
| Mn(1)-O(15)          | 2.115(2)   | Mn(3)-O(13)       | 2.095(3)   |
| Mn(1)-O(8)#1         | 2.130(3)   | Mn(3)-O(3)        | 2.226(3)   |
| Mn(1)-O(8)           | 2.130(3)   | Mn(3)-N(6)        | 2.237(4)   |
| Mn(1)-O(6)           | 2.251(2)   | Mn(3)-N(7)        | 2.257(4)   |
| Mn(1)-O(6)#1         | 2.251(2)   | Mn(3)-O(4)        | 2.457(3)   |
| Mn(2)-O(9)           | 2.072(3)   | Mn(4)-O(2)#2      | 2.107(3)   |
| Mn(2)-O(1)           | 2.147(3)   | Mn(4)-O(2)        | 2.107(3)   |
| Mn(2)-N(4)           | 2.243(3)   | Mn(4)-O(10)       | 2.158(3)   |
| Mn(2)-N(5)           | 2.284(3)   | Mn(4)-O(10)#2     | 2.158(3)   |
| Mn(2)-O(6)           | 2.244(2)   | Mn(4)-O(3)#2      | 2.266(2)   |
| Mn(2)-O(7)           | 2.342(3)   | Mn(4)-O(3)        | 2.266(2)   |
| O(15)#1-Mn(1)-O(15)  | 180.000(1) | O(14)-Mn(3)-O(13) | 93.84(12)  |
| O(15)#1-Mn(1)-O(8)#1 | 89.22(10)  | O(14)-Mn(3)-O(3)  | 103.90(12) |
| O(15)-Mn(1)-O(8)#1   | 90.78(10)  | O(13)-Mn(3)-O(3)  | 103.70(10) |
| O(15)#1-Mn(1)-O(8)   | 90.78(10)  | O(14)-Mn(3)-N(6)  | 102.22(13) |
| O(15)-Mn(1)-O(8)     | 89.22(10)  | O(13)-Mn(3)-N(6)  | 89.96(14)  |

---

|                      |            |                      |            |
|----------------------|------------|----------------------|------------|
| O(8)#1-Mn(1)-O(8)    | 180.00(11) | O(3)-Mn(3)-N(6)      | 149.47(12) |
| O(15)#1-Mn(1)-O(6)   | 87.74(9)   | O(14)-Mn(3)-N(7)     | 93.69(14)  |
| O(15)-Mn(1)-O(6)     | 92.26(9)   | O(13)-Mn(3)-N(7)     | 162.60(14) |
| O(8)#1-Mn(1)-O(6)    | 90.83(10)  | O(3)-Mn(3)-N(7)      | 89.66(13)  |
| O(8)-Mn(1)-O(6)      | 89.17(10)  | N(6)-Mn(3)-N(7)      | 73.11(15)  |
| O(15)#1-Mn(1)-O(6)#1 | 92.26(9)   | O(14)-Mn(3)-O(4)     | 158.50(11) |
| O(15)-Mn(1)-O(6)#1   | 87.74(9)   | O(13)-Mn(3)-O(4)     | 98.36(11)  |
| O(8)#1-Mn(1)-O(6)#1  | 89.17(10)  | O(3)-Mn(3)-O(4)      | 56.01(9)   |
| O(8)-Mn(1)-O(6)#1    | 90.83(10)  | N(6)-Mn(3)-O(4)      | 95.46(11)  |
| O(6)-Mn(1)-O(6)#1    | 180.000(1) | N(7)-Mn(3)-O(4)      | 79.73(12)  |
| O(9)-Mn(2)-O(1)      | 94.12(11)  | O(2)#2-Mn(4)-O(2)    | 180.000(1) |
| O(9)-Mn(2)-N(4)      | 100.61(11) | O(2)#2-Mn(4)-O(10)   | 88.83(11)  |
| O(1)-Mn(2)-N(4)      | 87.32(12)  | O(2)-Mn(4)-O(10)     | 91.17(11)  |
| O(9)-Mn(2)-O(6)      | 97.41(10)  | O(2)#2-Mn(4)-O(10)#2 | 91.17(11)  |
| O(1)-Mn(2)-O(6)      | 108.86(10) | O(2)-Mn(4)-O(10)#2   | 88.83(11)  |
| N(4)-Mn(2)-O(6)      | 154.81(11) | O(10)-Mn(4)-O(10)#2  | 180.000(1) |
| O(9)-Mn(2)-N(5)      | 98.06(12)  | O(2)#2-Mn(4)-O(3)#2  | 90.96(9)   |
| O(1)-Mn(2)-N(5)      | 158.53(12) | O(2)-Mn(4)-O(3)#2    | 89.04(9)   |
| N(4)-Mn(2)-N(5)      | 73.13(13)  | O(10)-Mn(4)-O(3)#2   | 89.36(10)  |
| O(6)-Mn(2)-N(5)      | 87.08(10)  | O(10)#2-Mn(4)-O(3)#2 | 90.64(10)  |
| O(9)-Mn(2)-O(7)      | 154.30(10) | O(2)#2-Mn(4)-O(3)    | 89.04(9)   |
| O(1)-Mn(2)-O(7)      | 92.41(10)  | O(2)-Mn(4)-O(3)      | 90.96(9)   |
| N(4)-Mn(2)-O(7)      | 104.51(12) | O(10)-Mn(4)-O(3)     | 90.64(10)  |
| O(6)-Mn(2)-O(7)      | 57.02(9)   | O(10)#2-Mn(4)-O(3)   | 89.36(10)  |
| N(5)-Mn(2)-O(7)      | 84.22(11)  | O(3)#2-Mn(4)-O(3)    | 180.00(11) |

<sup>a</sup>Symmetry codes:#1 -x+2,-y+1,-z+2 #2 -x+2,-y-1,-z+1

---

**Table S2.** Selected bond lengths [Å] and angles [°] for **2**

|                      |           |                       |           |
|----------------------|-----------|-----------------------|-----------|
| Zn(1)-O(6)#1         | 1.907(17) | Zn(3)-O(9)            | 1.931(14) |
| Zn(1)-O(3)           | 1.947(16) | Zn(3)-O(14)#1         | 1.975(18) |
| Zn(1)-O(1)           | 1.953(15) | Zn(3)-N(5)#4          | 2.027(18) |
| Zn(1)-N(2)#2         | 2.072(19) | Zn(3)-O(10)           | 2.19(2)   |
| Zn(2)-O(4)           | 1.898(16) | Zn(3)-O(11)           | 2.229(18) |
| Zn(2)-O(6)           | 1.940(16) | Zn(4)-O(13)           | 1.935(16) |
| Zn(2)-O(7)           | 2.032(14) | Zn(4)-O(15)           | 1.991(18) |
| Zn(2)-N(1)#3         | 2.057(19) | Zn(4)-O(14)           | 2.012(18) |
| Zn(4)-N(4)#5         | 2.033(17) |                       |           |
| O(6)#1-Zn(1)-O(3)    | 107.2(8)  | O(14)#1-Zn(3)-O(11)   | 96.0(7)   |
| O(6)#1-Zn(1)-O(1)    | 125.7(7)  | N(5)#4-Zn(3)-O(11)    | 89.1(7)   |
| O(3)-Zn(1)-O(1)      | 97.2(7)   | O(10)-Zn(3)-O(11)     | 171.0(8)  |
| O(6)#1-Zn(1)-N(2)#2  | 97.5(7)   | O(9)-Zn(3)-Zn(4)#1    | 165.7(5)  |
| O(3)-Zn(1)-N(2)#2    | 100.8(7)  | O(14)#1-Zn(3)-Zn(4)#1 | 38.5(5)   |
| O(1)-Zn(1)-N(2)#2    | 124.9(7)  | N(5)#4-Zn(3)-Zn(4)#1  | 65.7(5)   |
| O(4)-Zn(2)-O(6)      | 124.3(7)  | O(10)-Zn(3)-Zn(4)#1   | 87.0(6)   |
| O(4)-Zn(2)-O(7)      | 98.2(7)   | O(11)-Zn(3)-Zn(4)#1   | 97.2(5)   |
| O(6)-Zn(2)-O(7)      | 107.6(7)  | O(13)-Zn(4)-O(15)     | 98.3(7)   |
| O(4)-Zn(2)-N(1)#3    | 124.6(7)  | O(13)-Zn(4)-O(14)     | 113.2(7)  |
| O(6)-Zn(2)-N(1)#3    | 96.1(7)   | O(15)-Zn(4)-O(14)     | 111.3(7)  |
| O(7)-Zn(2)-N(1)#3    | 104.0(7)  | O(13)-Zn(4)-N(4)#5    | 128.5(7)  |
| O(9)-Zn(3)-O(14)#1   | 128.2(7)  | O(15)-Zn(4)-N(4)#5    | 104.2(7)  |
| O(9)-Zn(3)-N(5)#4    | 127.5(7)  | O(14)-Zn(4)-N(4)#5    | 100.8(7)  |
| O(14)#1-Zn(3)-N(5)#4 | 104.2(7)  | O(13)-Zn(4)-Zn(3)#6   | 143.2(5)  |
| O(9)-Zn(3)-O(10)     | 88.6(7)   | O(15)-Zn(4)-Zn(3)#6   | 112.6(5)  |
| O(14)#1-Zn(3)-O(10)  | 92.2(8)   | O(14)-Zn(4)-Zn(3)#6   | 37.7(5)   |

---

|                    |         |                      |         |
|--------------------|---------|----------------------|---------|
| N(5)#4-Zn(3)-O(10) | 85.4(8) | N(4)#5-Zn(4)-Zn(3)#6 | 63.7(5) |
|--------------------|---------|----------------------|---------|

<sup>a</sup>Symmetry codes: #1  $x+1,y,z$  #2  $x+1/2,y+1/2,z$  #3  $x-1/2,y+1/2,z$  #4  $x+1/2,y-1/2,z$  #5  $x-1/2,y-1/2,z$  #6  $x-1,y,z$

---

**Table S3.** Selected bond lengths [Å] and angles [°] for **3**

---

|                     |            |                     |           |
|---------------------|------------|---------------------|-----------|
| Cd(1)-O(4)#1        | 2.253(2)   | Cd(1)-O(11)         | 2.392(3)  |
| Cd(1)-O(2)          | 2.326(2)   | Cd(1)-O(6)          | 2.407(2)  |
| Cd(1)-O(9)          | 2.340(3)   | Cd(1)-O(3)#1        | 2.535(3)  |
| Cd(1)-O(6)#2        | 2.381(2)   |                     |           |
| O(4)#1-Cd(1)-O(2)   | 135.89(9)  | O(2)-Cd(1)-O(6)     | 55.25(8)  |
| O(4)#1-Cd(1)-O(9)   | 97.82(9)   | O(9)-Cd(1)-O(6)     | 84.79(9)  |
| O(2)-Cd(1)-O(9)     | 95.19(9)   | O(6)#2-Cd(1)-O(6)   | 76.06(9)  |
| O(4)#1-Cd(1)-O(6)#2 | 92.71(9)   | O(11)-Cd(1)-O(6)    | 78.64(9)  |
| O(2)-Cd(1)-O(6)#2   | 131.29(9)  | O(4)#1-Cd(1)-O(3)#1 | 53.97(8)  |
| O(9)-Cd(1)-O(6)#2   | 77.56(9)   | O(2)-Cd(1)-O(3)#1   | 87.44(8)  |
| O(4)#1-Cd(1)-O(11)  | 95.85(9)   | O(9)-Cd(1)-O(3)#1   | 80.29(9)  |
| O(2)-Cd(1)-O(11)    | 85.85(9)   | O(6)#2-Cd(1)-O(3)#1 | 136.50(8) |
| O(9)-Cd(1)-O(11)    | 159.08(10) | O(11)-Cd(1)-O(3)#1  | 120.62(9) |
| O(6)#2-Cd(1)-O(11)  | 86.06(9)   | O(6)-Cd(1)-O(3)#1   | 138.23(8) |
| O(4)#1-Cd(1)-O(6)   | 167.71(8)  |                     |           |

<sup>a</sup>Symmetry codes: #1  $x-1,y-1,z+1$  #2  $-x,-y+2,-z+2$

---

**Table S4.** Selected bond lengths [Å] and angles [°] for **4**

|                 |            |                 |          |
|-----------------|------------|-----------------|----------|
| Cu(1)-O(2)      | 1.9433(17) | Cu(1)-N(5)      | 2.022(2) |
| Cu(1)-O(3)      | 1.9502(17) | Cu(1)-O(6)      | 2.393(2) |
| Cu(1)-N(4)      | 2.009(2)   |                 |          |
| O(2)-Cu(1)-O(3) | 94.07(8)   | N(4)-Cu(1)-N(5) | 81.64(9) |
| O(2)-Cu(1)-N(4) | 91.09(8)   | O(2)-Cu(1)-O(6) | 96.62(8) |
| O(3)-Cu(1)-N(4) | 166.45(8)  | O(3)-Cu(1)-O(6) | 93.58(8) |
| O(2)-Cu(1)-N(5) | 172.73(8)  | N(4)-Cu(1)-O(6) | 98.26(8) |
| O(3)-Cu(1)-N(5) | 93.03(9)   | N(5)-Cu(1)-O(6) | 84.51(9) |

**Table S5.** Geometrical Parameters of Hydrogen Bonds (Å, °) for complex **2**

| D-H...A                | d(D-H) | d(H...A) | d(D...A) | <(DHA) | Symmetry codes |
|------------------------|--------|----------|----------|--------|----------------|
| O(16)-H(16B)...O(7)#1  | 0.85   | 2.10     | 2.79(2)  | 138.1  | x+1,y,z        |
| O(15)-H(15B)...O(17)#7 | 0.85   | 1.97     | 2.81(2)  | 171.2  | x-1,y,z        |
| O(11)-H(11B)...O(6)#9  | 0.85   | 2.64     | 3.12(2)  | 116.8  | x+1,-y+1,z+1/2 |
| O(11)-H(11B)...O(5)#9  | 0.85   | 2.29     | 2.95(2)  | 133.7  | x+1,-y+1,z+1/2 |
| O(17)-H(17B)...O(10)#5 | 0.85   | 2.15     | 2.92(3)  | 150.4  | x, y, z        |
| O(15)-H(15A)...O(5)#5  | 0.85   | 1.85     | 2.70(2)  | 178.7  | x, y, z        |
| O(10)-H(10A)...O(2)#5  | 0.85   | 1.88     | 2.73(2)  | 175.0  | x, y, z        |
| O(7)-H(7A)...O(12)#5   | 0.85   | 1.75     | 2.58(2)  | 168.4  | x, y, z        |
| O(3)-H(3A)...O(16)#5   | 0.85   | 1.99     | 2.82(2)  | 164.8  | x, y, z        |

**Table S6.** Geometrical Parameters of Hydrogen Bonds (Å, °) for complex **3**

| D-H...A                | d(D-H)  | d(H...A) | d(D...A) | <(DHA) | Symmetry codes |
|------------------------|---------|----------|----------|--------|----------------|
| O(17)-H(10)...N#5      | 0.83(8) | 2.02(8)  | 2.832(4) | 164(7) | -x+1,-y+1,-z+1 |
| O(16)-H(8)...O(17)#4   | 0.83(4) | 1.98(5)  | 2.790(4) | 167(4) | x, y, z        |
| N(2)-H(6)...O(17)#6    | 1.08(8) | 1.72(8)  | 2.793(4) | 170(6) | x+1, y, z      |
| O(16)-H(2)...N(1)#7    | 0.88(6) | 2.08(6)  | 2.946(4) | 172(5) | -x+1,-y+2,-z+1 |
| O(9)-H(1)...O(11)#2    | 0.81(6) | 2.10(6)  | 2.913(4) | 173(5) | -x,-y+2,-z+2   |
| O(17)-H(17B)...O(4)#8  | 0.84    | 1.90     | 2.726(4) | 166.8  | x-1,y-1,z      |
| O(13)-H(13B)...O(11)#9 | 0.80    | 2.17     | 2.814(4) | 138.4  | x, y, z-1      |

**Table S7.** Geometrical Parameters of Hydrogen Bonds (Å, °) for complex **4**

| D-H...A             | d(D-H)    | d(H...A)  | d(D...A) | <(DHA) | Symmetry codes  |
|---------------------|-----------|-----------|----------|--------|-----------------|
| O(4)-H(4B)...O(1)#4 | 0.842(10) | 2.61(3)   | 3.004(3) | 110(2) | -x,-y,-z+1      |
| O(4)-H(4B)...O(3)#4 | 0.842(10) | 2.537(13) | 3.347(3) | 162(3) | -x,-y,-z+1      |
| O(4)-H(4A)...O(1)#5 | 0.841(10) | 2.214(13) | 3.010(3) | 158(3) | x,y,z+1         |
| O(6)-H(6B)...O(1)#1 | 0.80(4)   | 1.98(4)   | 2.719(3) | 152(4) | x, y, z         |
| O(6)-H(6A)...N(3)#6 | 0.81(3)   | 2.18(3)   | 2.968(3) | 165(3) | -x,y+1/2,-z+1/2 |
| N(2)-H(2)...O(7)    | 0.90(3)   | 2.00(3)   | 2.870(3) | 163(3) | x-1,y,z         |
